# Supplementary material for: Supramolecular polycationic hydrogels with high swelling capacity prepared by partial methacrylation of polyethyleneimine
Source: Royal Society of Chemistry journal article supplement (doi:10.1039/c5ra16576h), 2015-01-01
Supplement: c5ra16576h1.pdf [file c5ra16576h1.pdf]

## Electronic Supplementary Information

### Supramolecular polycationic hydrogels with high swelling capacity prepared by partial methacrylation of polyethyleneimine

Antonio Paciello<sup>a</sup> and M. Gabriella Santonicola<sup>b\*</sup>

<sup>a</sup>Center for Advanced Biomaterials for Healthcare, Istituto Italiano di Tecnologia, and Interdisciplinary Research Centre on Biomaterials (CRIB), University of Naples Federico II, 80125 Naples, Italy

<sup>b</sup>Department of Chemical Materials and Environmental Engineering, Sapienza University of Rome, Via del Castro Laurenziano 7, 00161 Rome, Italy

\*Corresponding author: Tel: +39 06 49766372. E-mail: mariagabriella.santonicola@uniroma1.it

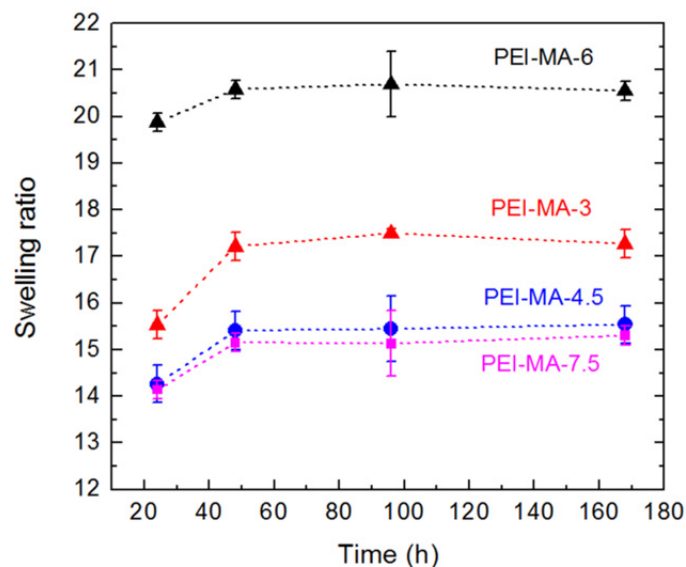

**Fig. S1** Swelling kinetics of PEI-MA hydrogels in water at room temperature. Error bars represent standard deviations of data from quintuplicate samples.
